# Supplementary material for: Bulk synthesis of conductive non-metallic carbon nanospheres and a 3D printed carrier device for scanning electron microscope calibration
Source: Royal Society of Chemistry journal article supplement (doi:10.1039/d3ra03956k), 2023-01-01
Supplement: d3ra03956k1.pdf [file d3ra03956k1.pdf]

## Support Information

### Bulk Synthesis of Conductive Non-Metallic Carbon Nanospheres and a 3D Printed Carrier

#### Device for Scanning Electron Microscope Calibration

ManLu Wang<sup>1</sup>, JiaCheng Wu<sup>2</sup>, LiYing Hao<sup>1</sup>, Qiang Wei<sup>1\*</sup>

(1. Analytical & Testing Center, State Key Laboratory of Oral Diseases, West China Hospital of Stomatology, Sichuan University, Chengdu 610041, China

2. Department of Dental Technology, West China Hospital of Stomatology, Sichuan University, Chengdu 610041, China)

\*Corresponding author: Qiang Wei, E-mail: weiqiang945@scu.edu.cn

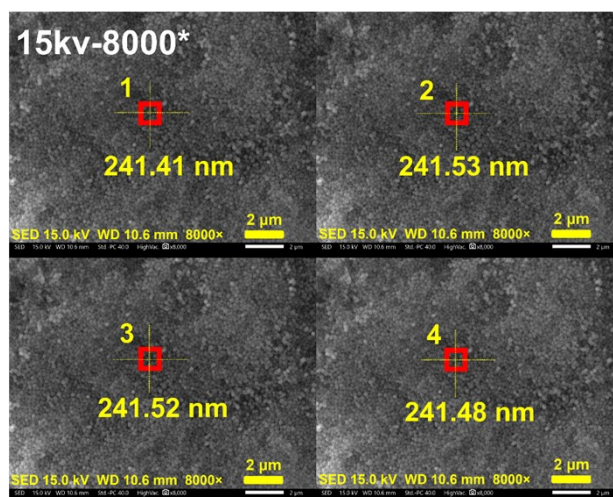

**Fig. S1.** Four SEM images of conductive carbon nanospheres at an accelerating voltage of 15 kV and a magnification of 8000

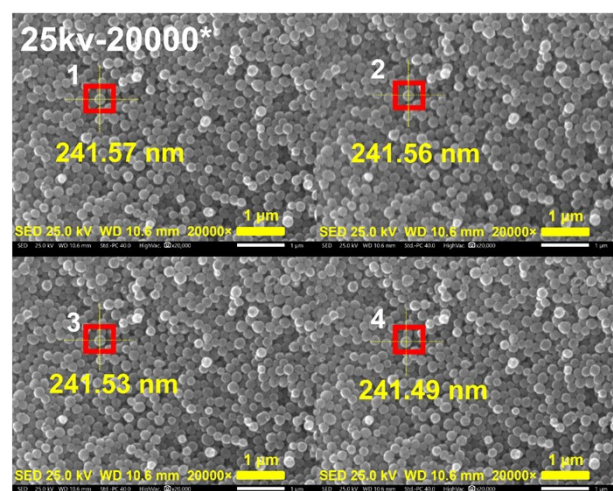

**Fig. S2.** Four SEM images of conductive carbon nanospheres at an accelerating voltage of 25 kV and a magnification of 20000

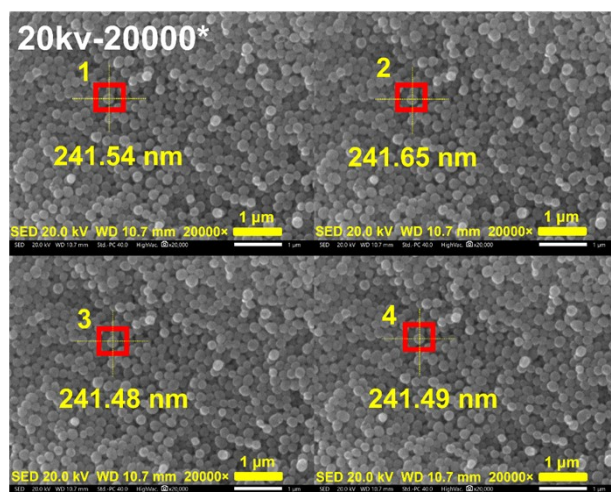

**Fig. S3.** Four SEM images of conductive carbon nanospheres at an accelerating voltage of 20 kV and a magnification of 20000

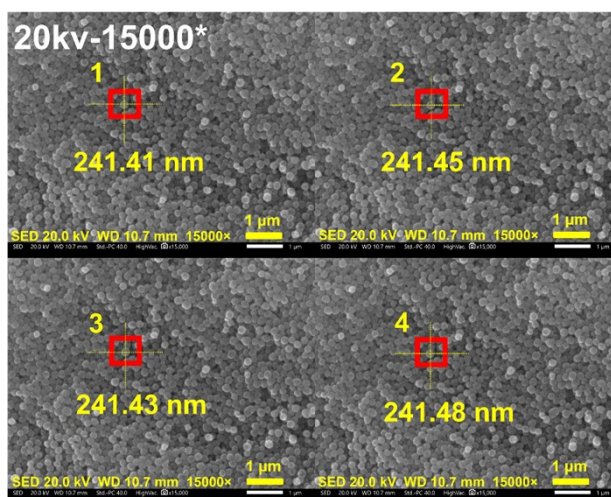

**Fig.S4.** Four SEM images of conductive carbon nanospheres at an accelerating voltage of 20 kV and a magnification of 15000

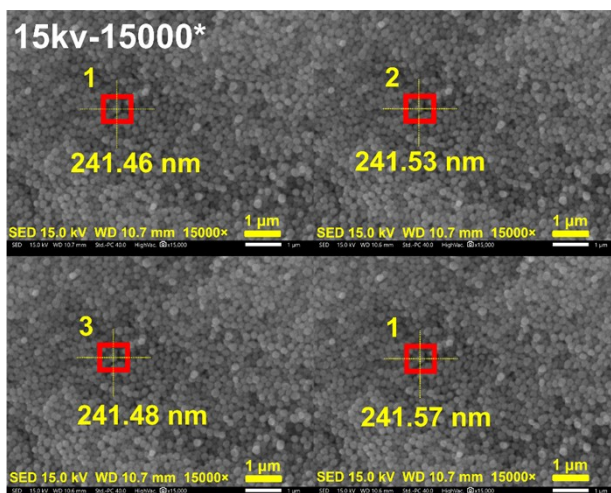

**Fig. S5.** Four SEM images of conductive carbon nanospheres at an accelerating voltage of 15 kV and a magnification of 15000

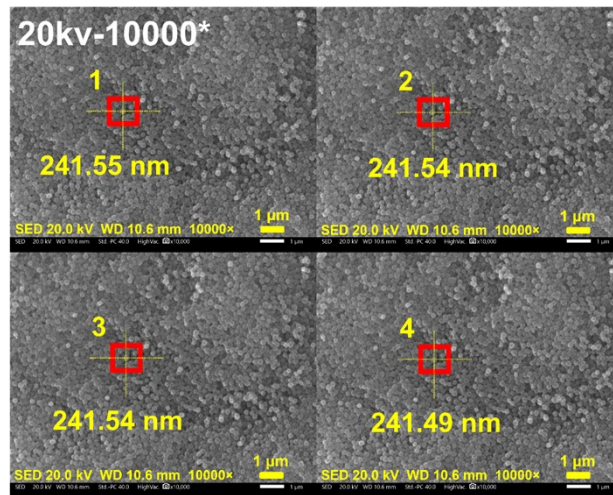

**Fig. S6.** Four SEM images of conductive carbon nanospheres at an accelerating voltage of 20 kV and a magnification of 10000

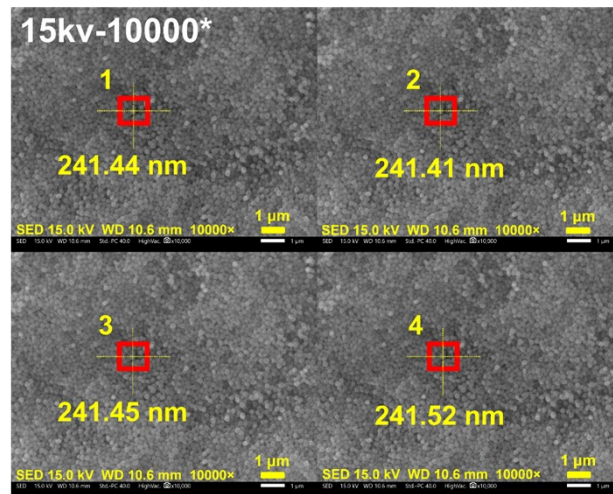

**Fig. S7.** Four SEM images of conductive carbon nanospheres at an accelerating voltage of 15 kV and a magnification of 10000

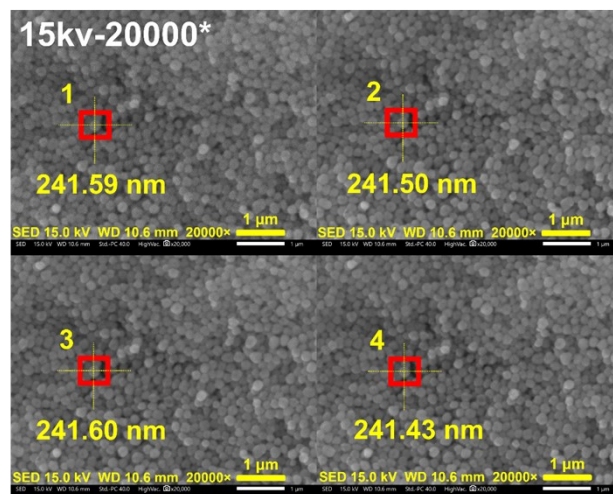

**Fig.S8.** Four SEM images of conductive carbon nanospheres at an accelerating voltage of 15 kV and a magnification of 20000

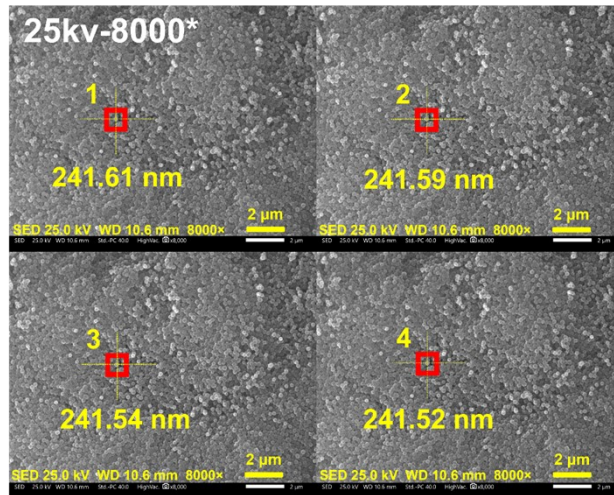

**Fig. S9.** Four SEM images of conductive carbon nanospheres at an accelerating voltage of 25 kV and a magnification of 8000

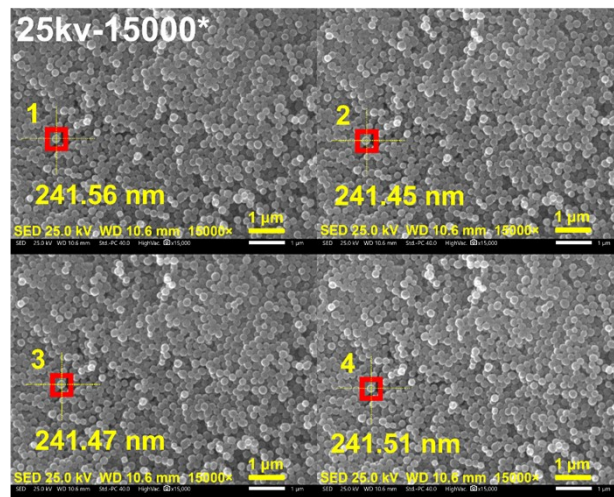

**Fig. S10.** Four SEM images of conductive carbon nanospheres at an accelerating voltage of 25 kV and a magnification of 15000

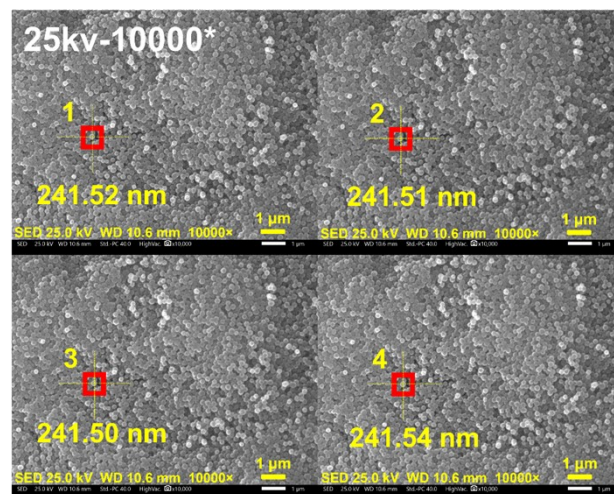

**Fig. S11.** Four SEM images of conductive carbon nanospheres at an accelerating voltage of 25 kV and a magnification of 10000

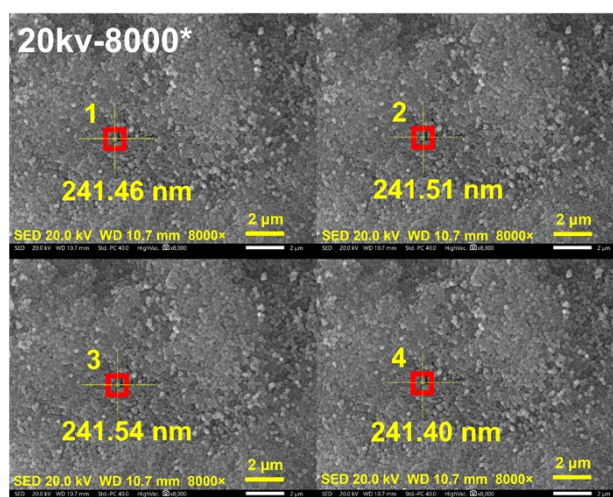

**Fig. S12.** Four SEM images of conductive carbon nano-spheres at an accelerating voltage of 20 kV and a magnification of 8000

**Table S1.** Normality test by Shapiro-Wilk test for two-way ANOVA data

| Variable           | Level | Statistic | df | p value |
|--------------------|-------|-----------|----|---------|
| Voltage (kV)       | 15    | 0.952     | 16 | 0.523   |
|                    | 20    | 0.944     | 16 | 0.405   |
|                    | 25    | 0.991     | 16 | 0.999   |
| Enlargement factor | 8000  | 0.949     | 12 | 0.616   |
|                    | 10000 | 0.885     | 12 | 0.102   |
|                    | 15000 | 0.947     | 12 | 0.592   |
|                    | 20000 | 0.982     | 12 | 0.991   |

**Table S2.** Levene's test of equality of error variances for two-way ANOVA data <sup>a,b</sup>

| Dependent variable                   | Statistic | df1 | df2    | p value |
|--------------------------------------|-----------|-----|--------|---------|
| Based on Mean                        | 1.536     | 11  | 36     | 0.161   |
| Based on Median                      | 1.236     | 11  | 36     | 0.300   |
| Based on Median and with adjusted df | 1.236     | 11  | 19.248 | 0.329   |
| Based on trimmed mean                | 1.528     | 11  | 36     | 0.164   |

Tests the null hypothesis that the error variance of the dependent variable is equal across groups.

a. Dependent variable: measured diameter

b. Design: Intercept + Accelerating voltage + Magnification + Voltage \* Enlargement factor

**Table S3** Two-way ANOVA for measured diameters (independent variables: accelerating voltage and magnification)

| Source                                  | SS          | df | MS    | p value |
|-----------------------------------------|-------------|----|-------|---------|
| Accelerating voltage                    | 0.012       | 2  | 0.006 | 0.119   |
| Magnification                           | 0.017       | 3  | 0.006 | 0.104   |
| Accelerating voltage *<br>Magnification | 0.031       | 6  | 0.005 | 0.098   |
| Error                                   | 0.094       | 36 | 0.003 |         |
| Total                                   | 2799637.206 | 48 |       |         |

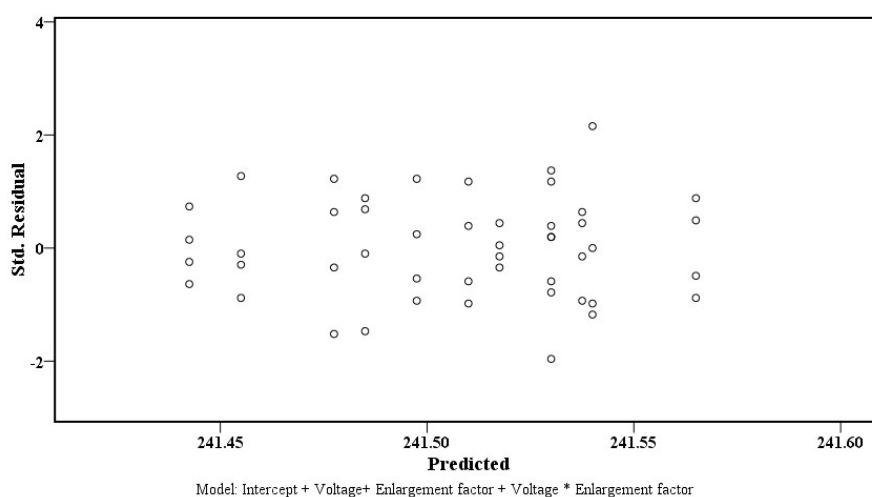

**Fig.S13.** Residual plot of two-way ANOVA (standardized residuals against predicted)

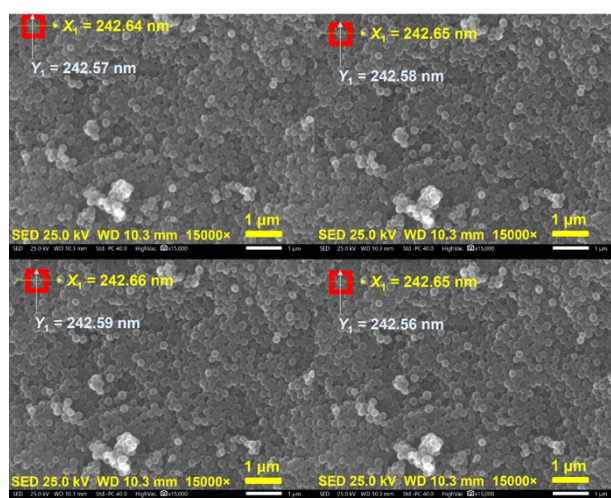

**Fig. S14.** Four SEM images of conductive carbon nanospheres at an accelerating voltage of 25 kV

and a magnification of 15000 (Upper left corner)

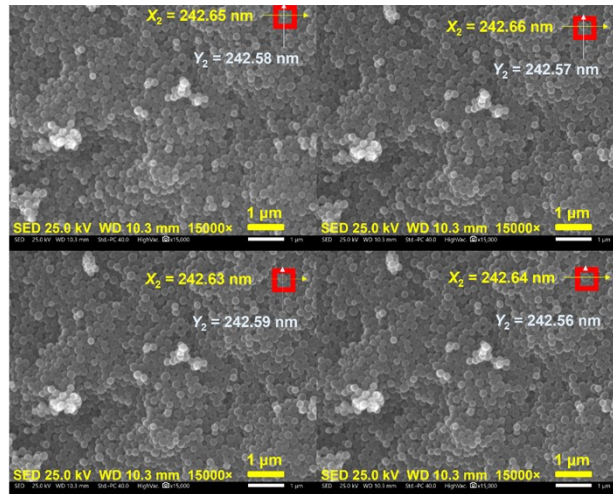

**Fig. S15.** Four SEM images of conductive carbon nanospheres at an accelerating voltage of 25 kV

and a magnification of 15000 (Upper right corner)

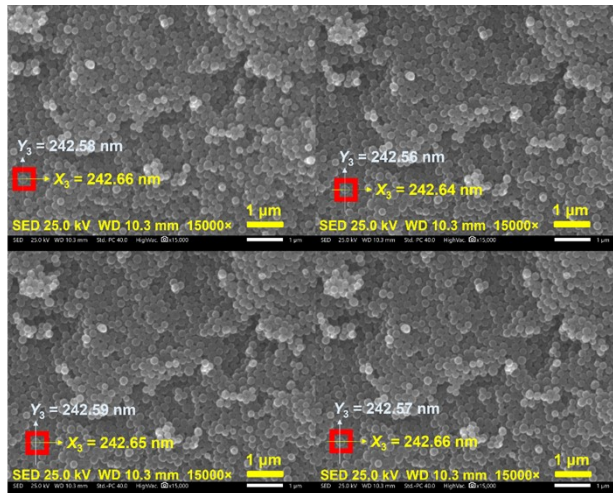

**Fig. S16.** Four SEM images of conductive carbon nanospheres at an accelerating voltage of 25 kV

and a magnification of 15000 (Bottom left corner)

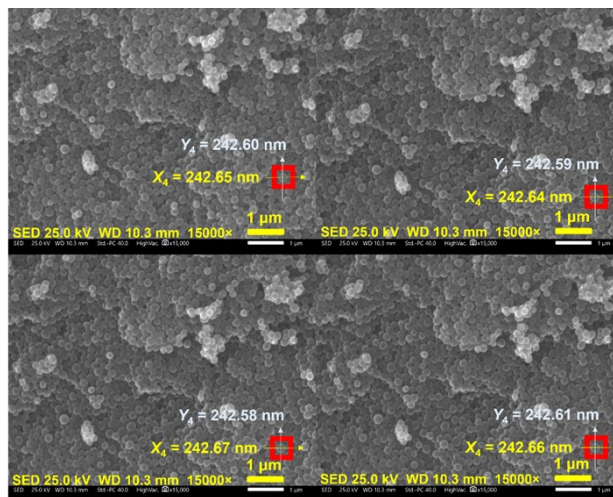

**Fig. S17.** Four SEM images of conductive carbon nanospheres at an accelerating voltage of 25 kV

and a magnification of 15000 (Bottom right corner)

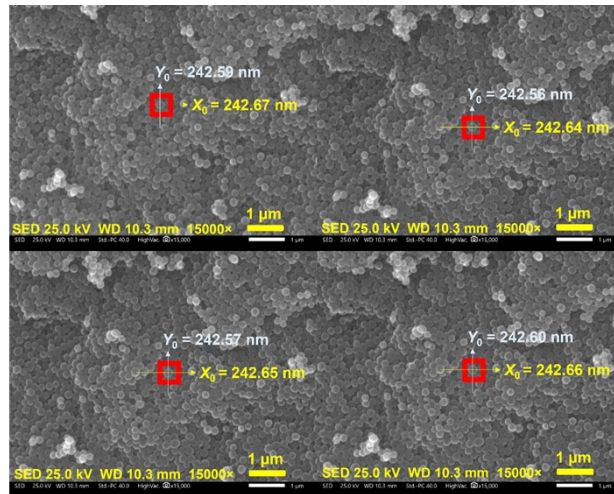

**Fig. S18.** Four SEM images of conductive carbon nanospheres at an accelerating voltage of 25 kV and a magnification of 15000 (Central Area)

**Table S4.** Normality test by Shapiro-Wilk test for one-way ANOVA data of X-axis direction and Y-axis direction.

| Position    | X-axis direction |    |         | Y-axis direction |    |         |
|-------------|------------------|----|---------|------------------|----|---------|
|             | Statistic        | df | P value | Statistic        | df | P value |
| Center      | 0.895            | 4  | 0.406   | 0.950            | 4  | 0.714   |
| Top left    | 0.945            | 4  | 0.683   | 0.993            | 4  | 0.972   |
| Top right   | 0.993            | 4  | 0.972   | 0.993            | 4  | 0.972   |
| Bottom left | 0.863            | 4  | 0.272   | 0.993            | 4  | 0.972   |
| Bottom left | 0.993            | 4  | 0.972   | 0.993            | 4  | 0.972   |

**Table S5.** Levene's test of equality of error variances for one-way ANOVA data of X-axis direction and Y-axis direction. <sup>a</sup>

| Dependent variable                                                  | Statistic                            | df1   | df2 | p value |       |
|---------------------------------------------------------------------|--------------------------------------|-------|-----|---------|-------|
| Microsphere diameters measured in X-axis direction with adjusted df | Based on Mean                        | 0.506 | 4   | 15      | 0.732 |
|                                                                     | Based on Median                      | 0.404 | 4   | 15      | 0.803 |
|                                                                     | Based on Median and with adjusted df | 0.404 | 4   | 11.393  | 0.802 |
|                                                                     | Based on trimmed mean                | 0.493 | 4   | 15      | 0.471 |



|                              |                                         |       |   |        |       |
|------------------------------|-----------------------------------------|-------|---|--------|-------|
|                              | Based on Mean                           | 0.600 | 4 | 15     | 0.668 |
| Microsphere diameters        | Based on Median                         | 0.600 | 4 | 15     | 0.668 |
| measured in Y-axis direction | Based on Median and<br>with adjusted df | 0.600 | 4 | 15.000 | 0.668 |
|                              | Based on trimmed mean                   | 0.600 | 4 | 15     | 0.668 |

Tests the null hypothesis that the error variance of the dependent variable is equal across groups.

a. Design: Intercept + Position

**Table S6.** One-way ANOVA of photographing positions for measured diameters in the X-axis direction and the Y-axis direction

| Source                      | SS          | df | MS        | p value |
|-----------------------------|-------------|----|-----------|---------|
| Position (X-axis direction) | 0.000       | 4  | 0.0000575 | 0.776   |
| Error (X-axis direction)    | 0.002       | 15 | 0.000     |         |
| Total (X-axis direction)    | 1177590.158 | 20 |           |         |
| Position (Y-axis direction) | 0.001       | 4  | 0.000     | 0.252   |
| Error (Y-axis direction)    | 0.003       | 15 | 0.000     |         |
| Total (Y-axis direction)    | 1176901.132 | 20 |           |         |

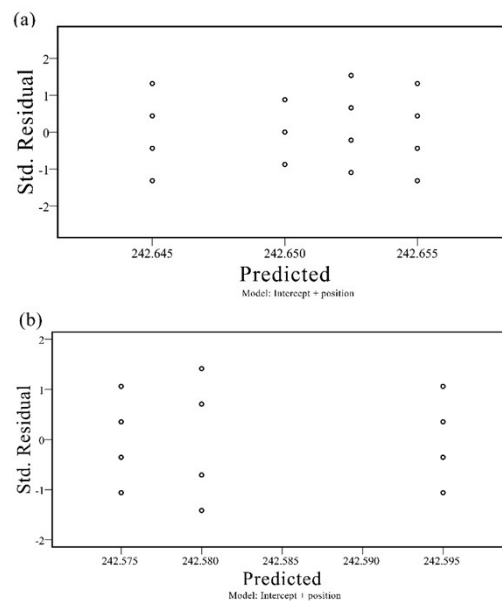

**Fig.S19.** Residual plots of one-way ANOVA, (a) measured diameters measured in X-axis direction, (b) measured diameters measured in Y-axis direction (standardized residuals against

predicted).
